# Supplementary material for: Epigenetic modulation of neuroblastoma enhances T cell and NK cell immunogenicity by inducing a tumor-cell lineage switch
Source: PubMed Central journal article supplement — J Immunother Cancer. 2022 Dec 15;10(12):e005002. doi: 10.1136/jitc-2022-005002 (PMC9756225; doi:10.1136/jitc-2022-005002), 2022-12-15
Supplement: jitc-2022-005002supp001.pdf [file jitc-2022-005002supp001.pdf]

## Supplementary Material

**Supplementary table 1** – List of HDAC inhibitors upregulating MHC-I expression in GIMEN reporter cells. *HDAC = Histone Deacetylase, % HLA-ABC expression standardized to untreated control cells*

| Compound              | Alternative Names           | Target                                | % HLA-ABC expression |
|-----------------------|-----------------------------|---------------------------------------|----------------------|
| Citarinostat          | ACY-241, HDAC-IN-2          | HDAC3/6                               | 10.2%                |
| Fimepinostat          | CUDC-907                    | PI3K, & HDAC1/2/3/10                  | 49.9%                |
| Pracinostat           | SB939                       | panHDAC                               | 41.9%                |
| Abexinostat           | PCI-24781, CRA-024781       | panHDAC, most potent<br>against HDAC1 | 40.3%                |
| Mocetinostat          | MGCD0103, MG0103            | HDAC 1/2/3/11                         | 34.9%                |
| Entinostat            | MS-275, SNDX-275            | HDAC1/3                               | 26.8%                |
| Sodium Phenylbutyrate | 4-BPA, 4-phenylbutyric acid | HDAC1/2a                              | 25.7%                |
| Tucidinostat          | Chidamide, HBI-8000, CS-055 | HDAC1/2/3/10                          | 22.8%                |
| Dacinostat            | LAQ824, NVP-LAQ824          | panHDAC                               | 21.2%                |
| Resminostat           | RAS2410                     | HDAC1/3/6                             | 19.7%                |
| CUDC-101              | -                           | HDAC1/2, EGFR, HER2                   | 14.1%                |
| LMK-235               | -                           | HDAC4/5                               | 10.7%                |
| Citarinostat          | ACY-241, HDAC-IN-2          | HDAC3/6                               | 10.2%                |
| Droxinostat           | NS41080                     | HDAC3/6/8                             | 9.9%                 |
| Tubastatin A          | -                           | panHDAC, most potent<br>against HDAC6 | 9.9%                 |
| RGFP96                | -                           | panHDAC, most potent<br>against 3     | 9.4%                 |

**Supplementary table 2** – List of IAPi upregulating MHC-I expression in GIMEN reporter cells. *IAP = inhibitor of apoptosis, % HLA-ABC expression standardized to untreated control cells*

| Compound   | Alternative Names | Target                                    | % HLA-ABC expression |
|------------|-------------------|-------------------------------------------|----------------------|
| MX69       |                   | MDM2, XIAP                                | 46.8%                |
| GDC-0152   |                   | clAP1+2, XIAP, ML-IAP                     | 27.8%                |
| AZD-5582   |                   | clAP1+2, XIAP                             | 24.4%                |
| Xevinapant | AT-406            | clAP1+2, XIAP                             | 20.5%                |
| Birinapant | TL32711           | clAP1 mostly, less potent against<br>XIAP | 20.0%                |
| LCL-161    |                   | clAP1+2, XIAP                             | 19.8%                |

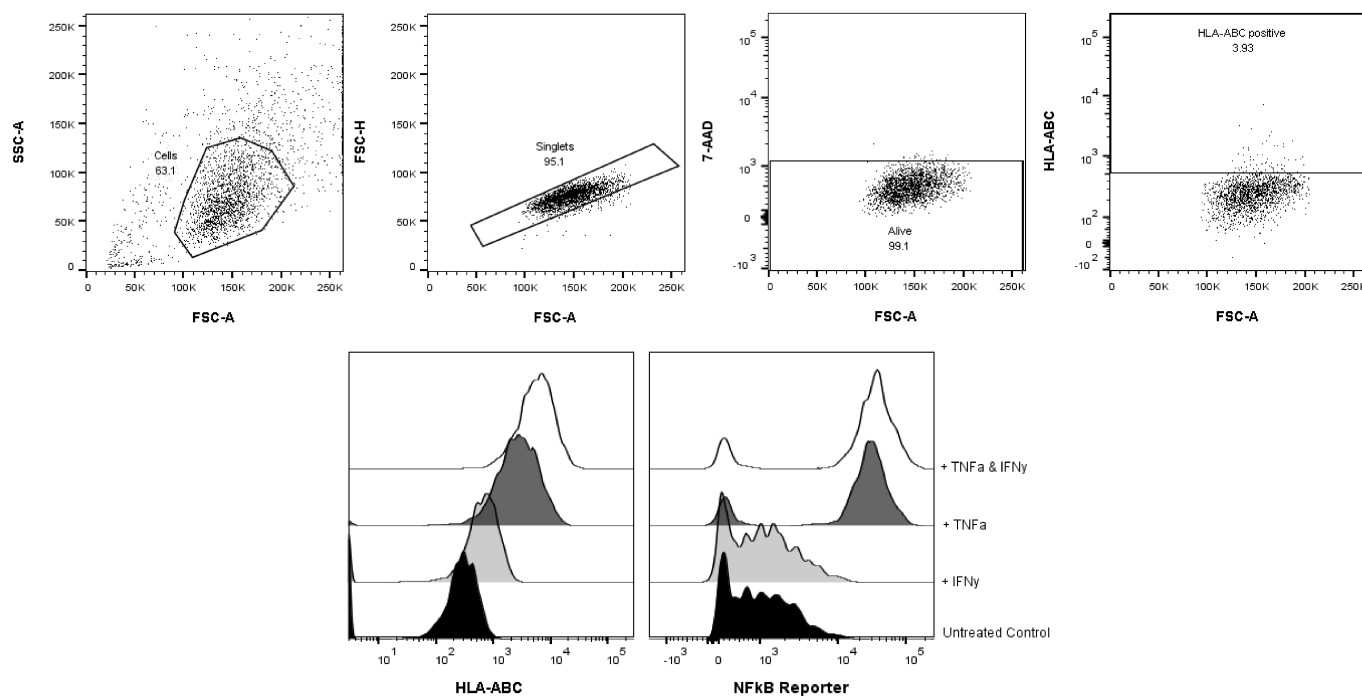

**Supplementary Figure 1** – Drug Library Screen Gating Strategy & Representative Controls. *Upper Panel: Gating strategy to identify HLA-ABC expressing cells. Lower Panel: MHC-I (left) and NFκB Reporter (right) induction upon cytokine incubation. Untreated cells were used as negative controls. Cells treated with 1000 U/mL IFN $\gamma$ , and/or 50 ng/mL TNF $\alpha$  were used as a positive control for MHC-I expression (HLA-ABC AF647) or NFκB Reporter (GFP) induction.*

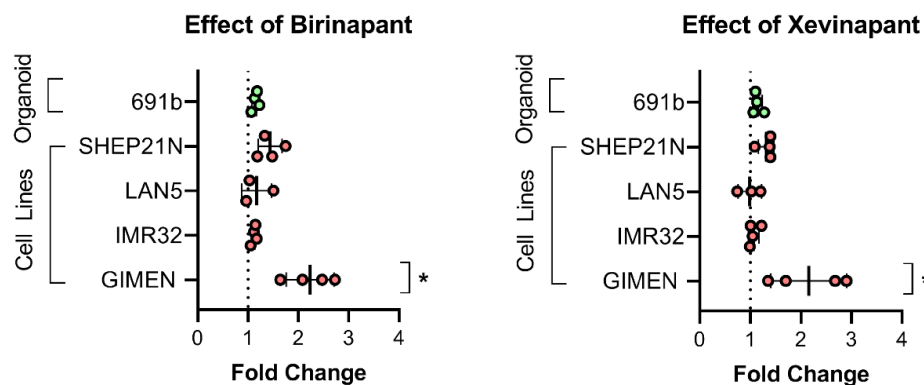

**Supplementary Figure 2** – Effect of two other IAPi across a panel of NBL lines. *Fold Induction of MHC-I expression relative to untreated control cells after 48h of incubation with 250 nM Birinapant or 500 nM Xevinapant. Data depicted as mean  $\pm$  SD. LAN5: n=3, rest: n=4, Statistical differences between MFIs were calculated with the Mann Whitney U test, \*p<0.05.*

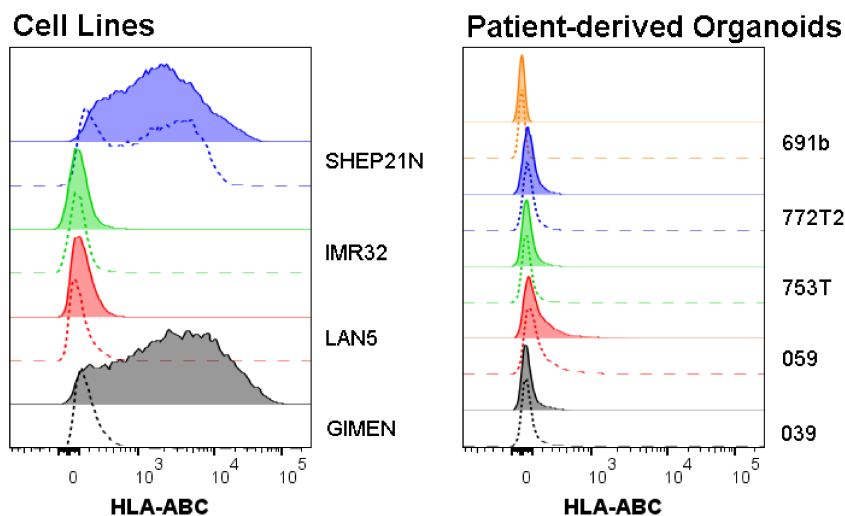

**Supplementary Figure 3** – Sensitivity of NBL models to TNF $\alpha$ -mediated NF $\kappa$ B pathway activation. *Dotted lines reflect unstimulated cells, filled histograms are stimulated with TNF $\alpha$  (0.5 ng/mL).*

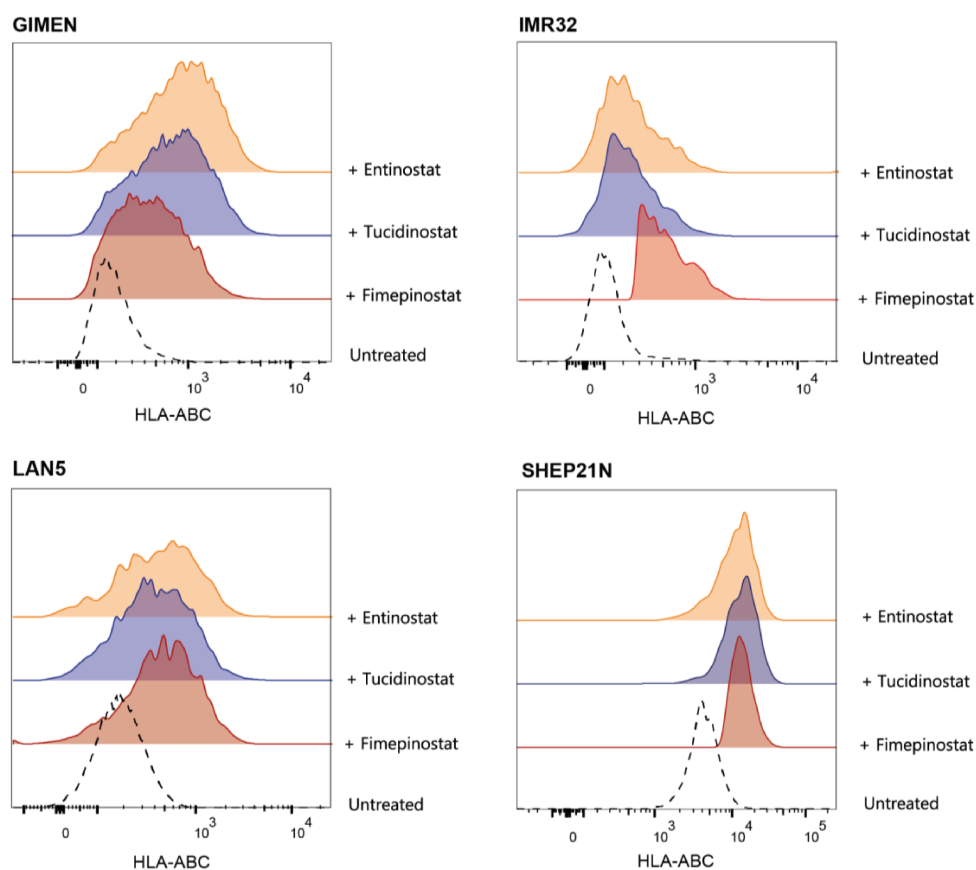

**Supplementary Figure 4** – Effect of two other HDA Ci, tucidinostat and fimepinostat, across a panel of NBL lines. *MHC-1 upregulation*

*after 48h treatment with Tucidinostat (GIMEN & LAN5: 5  $\mu$ M, SHEP21N: 2.5  $\mu$ M, IMR32 1.25  $\mu$ M) or Fimepinostat (GIMEN: 100 nM, LAN5 & SHEP21N: 25 nM, IMR32: 12.5 nM). Dotted line reflects untreated control cells.*

## MHC-I blocking experiment

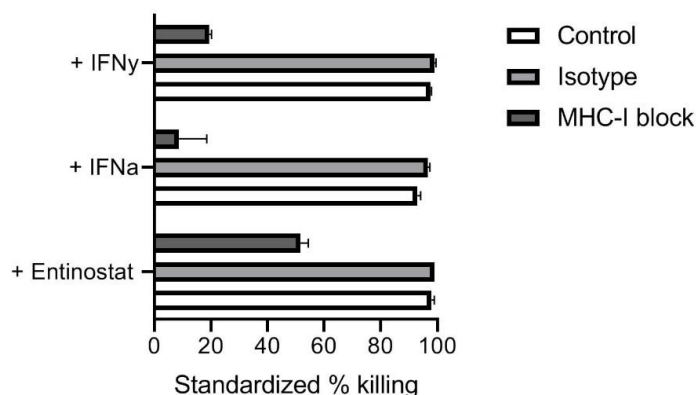

**Supplementary Figure 5** – Entinostat-induced T cell cytotoxicity is MHC-I dependent. *Luminescence-based cytotoxicity against luciferase-transduced 691b organoids after 48h pre-incubation with 2.5  $\mu$ M Entinostat, 1000 U/mL IFN $\alpha$ , or 100 U/mL IFN $\gamma$ . Co-cultures were performed either without presence of blocking antibody, with an isotype control, and with an MHC-I blocking antibody. Cells were co-cultured overnight at an E:T of 1:1. Data are shown as mean  $\pm$  SEM.*

## A. T cell Proliferation

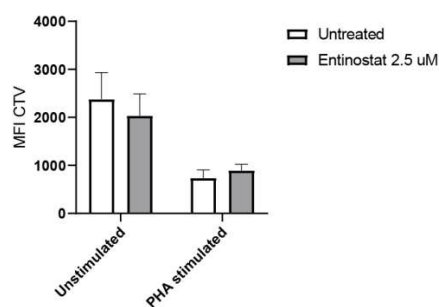

## B. Untreated T cells

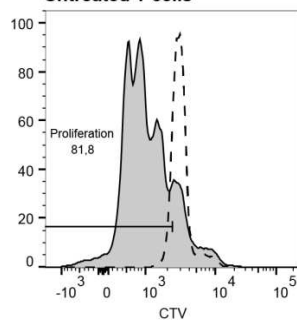

## Entinostat Treated T cells

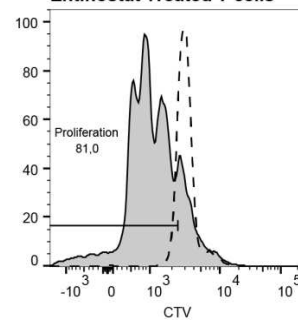

**Supplementary Figure 6** – Intact proliferative capacity of Entinostat pre-treated healthy-donor T cells. *Proliferative capacity of T cells based on CTV-dilution. (A) Shows the MFI in CTV in untreated and 2.5  $\mu$ M Entinostat pre-treated healthy-donor CD3+ T-cells. Data is shown from four donors, no significant differences based on the Mann Whitney U test. (B) shows the CTV division pattern in untreated (left) and entinostat pre-treated T cells (right).*

## MHC-I Presentation &amp; Proteasome Expression

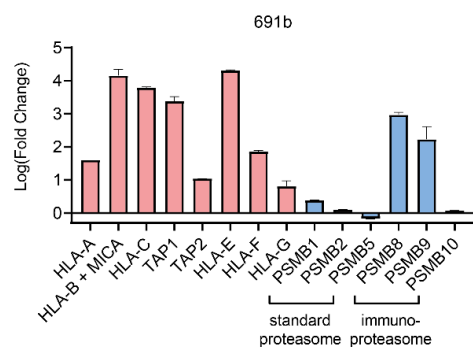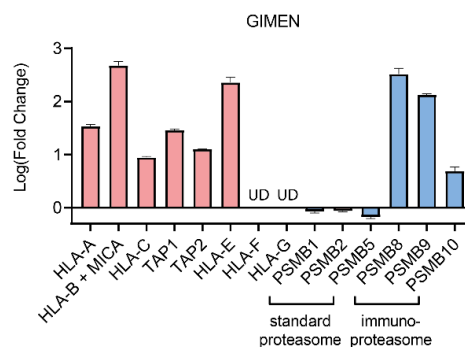

**Supplementary Figure 7** – qPCR validation of increases in transcript abundance observed with RNAseq  
 Data is depicted as  $\log(\text{fold change})$  between untreated and entinostat-treated 691b organoids (B) or GIMEN (C). Data relative to GAPDH. 691b: All  $\log(\text{fold changes})$  are significant, except HLA-G and PSMB9 ( $p=0.09$  and  $0.08$ , respectively). GIMEN: all  $\log(\text{fold changes})$  are significant, except PSMB1/2/5. UD = undetected. Duplos are shown as mean  $\pm$  SD. Statistical differences between  $\log(\text{fold changes})$  were calculated with a one sample T test.

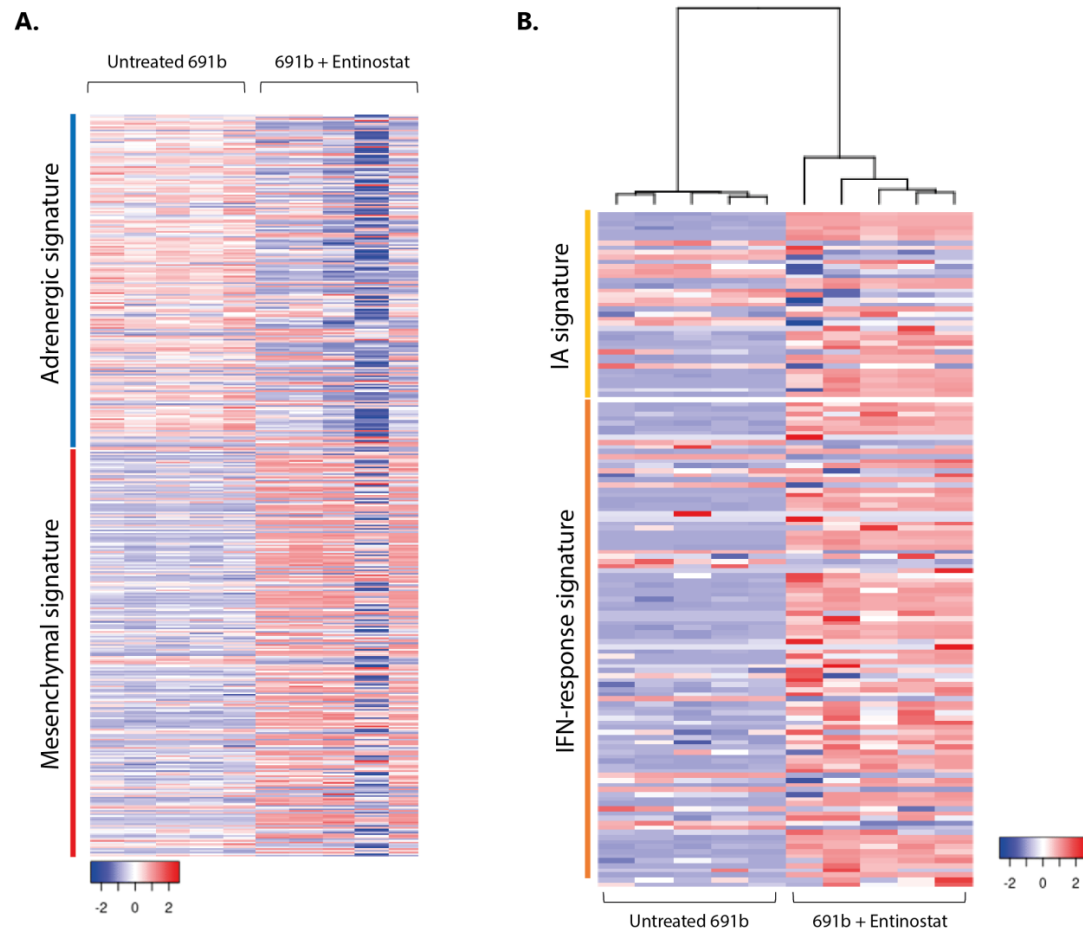

**Supplementary Figure 8** – Increased mesenchymal-, immune activation-, and IFN-response signature upon Entinostat treatment of 691b organoids. Heatmap showing individual signature components of cell lineage (A) and immune activation (IA) / IFN-response (B) in untreated and 691b Entinostat-treated organoids (48h, 2.5  $\mu\text{M}$  Entinostat).  $\log_2$  gene expression values were z-score transformed for heatmap visualization.

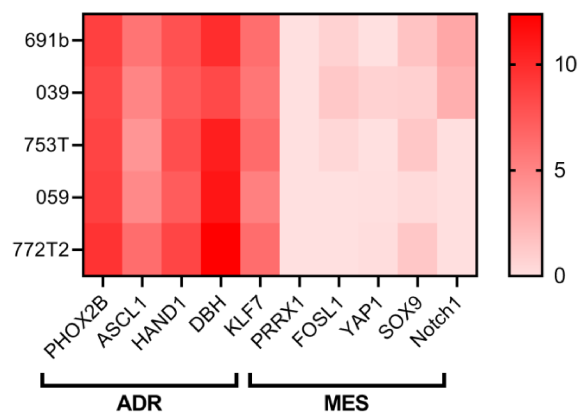

**Supplementary Figure 9** – Neuroblastoma cell lineage markers in utilized patient-derived organoid models. *ADR* = adrenergic, *MES* = mesenchymal.

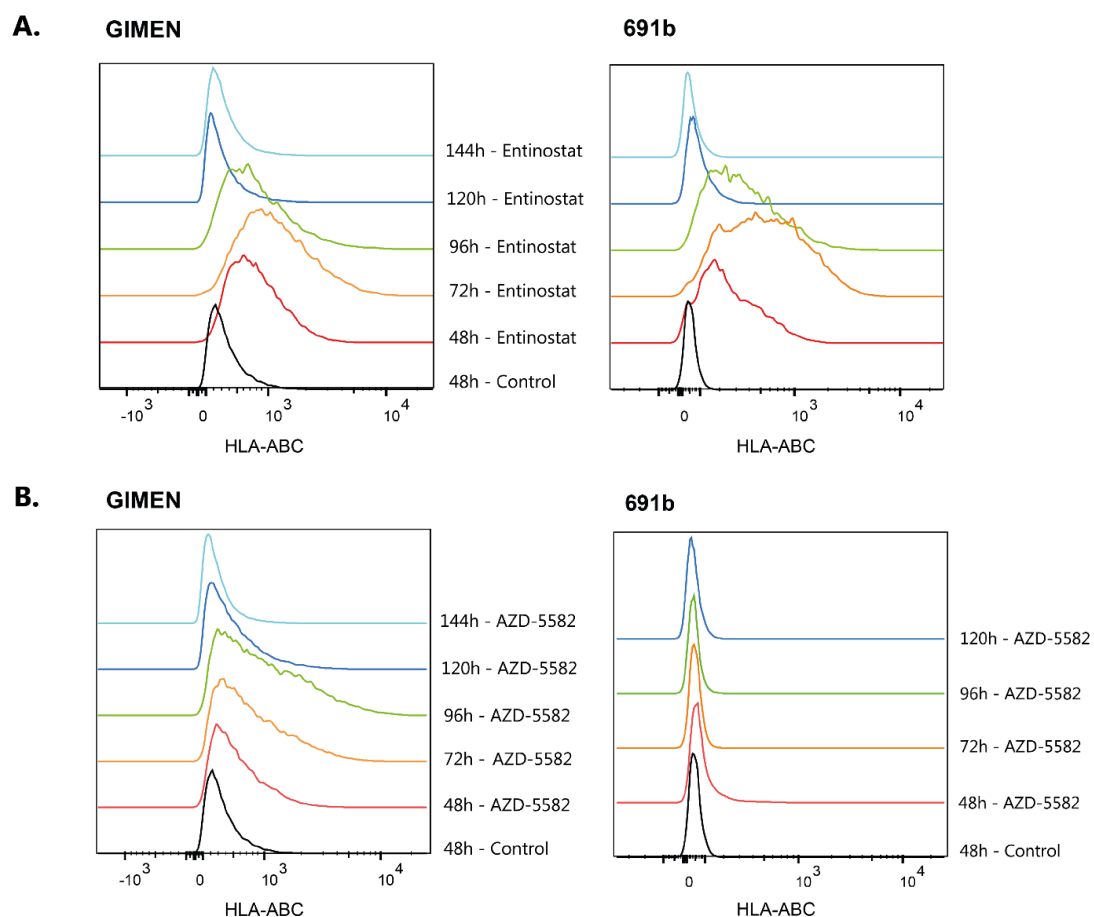

**Supplementary Figure 10** – MHC-I upregulation kinetics after drug incubation. *GIMEN* (left) and *691b* (right) were incubated with 2.5  $\mu$ M entinostat (**A**) or 62.5 nM AZD-5582 (**B**) for 48h, after which media was refreshed. Effect on MHC-I expression was determined at indicated timepoints. HLA-ABC expression in controls remained unchanged overtime, expression after 48h is shown as an example of baseline expression.

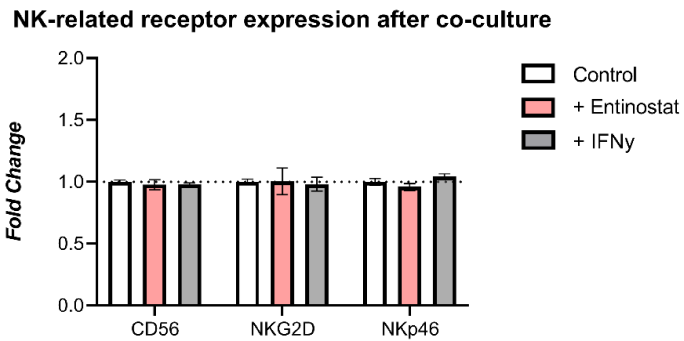

**Supplementary Figure 11** – Expression of three NK-related receptors on NK-cells after 5h co-culture with 691b organoids. Expression of NK-related receptors CD56, NKG2D and NKp46 on NK-cells after 5h co-culture with either untreated 691b control cells or 691b pre-treated for 48h with 2.5  $\mu$ M Entinostat or 100 U/mL IFN $\gamma$ . Expression is shown relative to untreated controls.
